# Supplementary material for: RUPEE: A fast and accurate purely geometric protein structure search
Source: PubMed Central journal article supplement (PMC6420038; doi:10.1371/journal.pone.0213712), 2019-03-15
Supplement: pone.0213712.s002.pdf [file pone.0213712.s002.pdf]

# 1 Fig

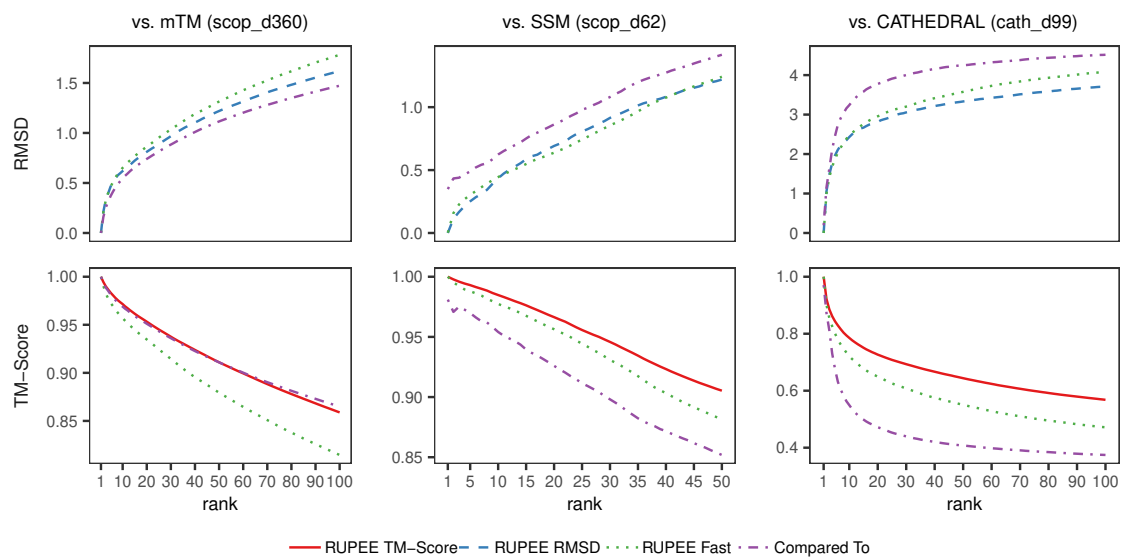

Figure 1: Scoring from CE pairwise alignments for RUPEE fast, RUPEE top-aligned sorted by TM-Score, and RUPEE top-aligned sorted by RMSD
